# Supplementary material
Source: HighWire-hosted journal article supplement (https://erj.ersjournals.com/content/56/2/2000237)
Supplement: inline-supplementary-material-1 [file inline-supplementary-material-1.pdf]

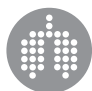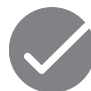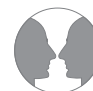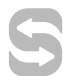

SHAREABLE PDF

# COPD sputum eosinophils: relationship to blood eosinophils and the effect of inhaled PDE4 inhibition

Dave Singh<sup>1</sup>, Henrik Watz<sup>2</sup>, Kai Michael Beeh<sup>3</sup>, Oliver Kornmann<sup>4</sup>, Brian Leaker<sup>5</sup>, Brendan Colgan<sup>6</sup>, Germano Lucci<sup>7</sup>, Aida Emirova<sup>7</sup>, Marie Anna Nandeuil<sup>7</sup>, Debora Santoro<sup>7</sup>, Deborah Balzano<sup>7</sup> and Mirco Govoni<sup>7</sup>

**Affiliations:** <sup>1</sup>Medicines Evaluation Unit, The University of Manchester, Manchester University NHS Foundation Trust Hospital, Manchester, UK. <sup>2</sup>Pulmonary Research Institute at Lung Clinic Grosshansdorf, Airway Research Center North (ARCN), Member of the German Center for Lung Research (DZL), Grosshansdorf, Germany. <sup>3</sup>Insaf Respiratory Research Institute, Wiesbaden, Germany. <sup>4</sup>IKF Pneumologie Frankfurt, Clinical Research Centre Respiratory Diseases, Frankfurt, Germany. <sup>5</sup>The Heart Lung Centre, London, UK. <sup>6</sup>Celerion, Belfast, UK. <sup>7</sup>Global Clinical Development, Chiesi Farmaceutici SpA, Parma, Italy.

**Correspondence:** Dave Singh, University of Manchester, Medicines Evaluation Unit, Manchester, M23 9QZ, UK. E-mail: dsingh@meu.org.uk

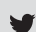

@ERSpublications

**PDE4 inhibition reduces sputum eosinophils in those COPD patients with higher eosinophil counts. This evidence supports an effect of PDE4 inhibitors on eosinophilic inflammation.** <https://bit.ly/3airXw7>

**Cite this article as:** Singh D, Watz H, Beeh KM, *et al.* COPD sputum eosinophils: relationship to blood eosinophils and the effect of inhaled PDE4 inhibition. *Eur Respir J* 2020; 56: 2000237 [<https://doi.org/10.1183/13993003.00237-2020>].

This single-page version can be shared freely online.

## To the Editor:

Patients with COPD who have higher eosinophil numbers in the airways and peripheral blood demonstrate a greater clinical response to inhaled corticosteroids (ICS) [1–3]. Furthermore, the effect of the oral phosphodiesterase-4 (PDE4) inhibitor roflumilast on exacerbations in severe COPD patients with chronic bronchitis, who are treated with ICS and long-acting bronchodilators, also appears to be greater at higher blood eosinophil counts [4]. The mechanisms responsible for these differential drug effects remain to be defined, but may relate to increased type-2 inflammation and/or decreased presence of colonising airway bacteria in COPD patients with more eosinophils [5, 6], leading to different responses to anti-inflammatory drugs. An association between blood and sputum eosinophils has been observed in some, but not all studies [7–12]. Accurate sputum eosinophil count measurement requires good quality samples to make cytopins where eosinophils can be clearly counted; variable quality of sputum samples, particularly in multicentre studies, will affect the ability to show a relationship with blood eosinophil counts.
